# Supplementary material for: Should All Patients With Pulmonary Hypertension Undergoing Non-Cardiac Surgery Be Managed by Cardiothoracic Fellowship-Trained Anesthesiologists?
Source: PubMed Central journal article supplement — Semin Cardiothorac Vasc Anesth. 2023 Sep 19;27(4):305–12. doi: 10.1177/10892532231203128 (PMC10676614; doi:10.1177/10892532231203128), 2023-09-19
Supplement: sj-pdf-1-scv-10.1177_10892532231203128.pdf [file sj-pdf-1-scv-10.1177_10892532231203128.pdf]

**Supplemental Table 1.** Baseline demographic and clinical characteristics of the unmatched sample population.

|                                          | <b>Non-CTA<br/>trained<br/>(n=589)</b> | <b>CTA<br/>trained<br/>(n=240)</b> | <b>P value</b>      |
|------------------------------------------|----------------------------------------|------------------------------------|---------------------|
| <b>Demographics</b>                      |                                        |                                    |                     |
| Age (years)                              | 64 ± 15                                | 63 ± 15                            | 0.452 <sup>2</sup>  |
| Female gender                            | 367 (62%)                              | 141 (59%)                          | 0.346 <sup>1</sup>  |
| Race                                     |                                        |                                    | 0.948 <sup>1</sup>  |
| White                                    | 334 (57%)                              | 133 (55%)                          |                     |
| Black                                    | 233 (40%)                              | 98 (41%)                           |                     |
| Hispanic                                 | 7 (1%)                                 | 2 (1%)                             |                     |
| Asian                                    | 4 (1%)                                 | 1 (<1%)                            |                     |
| Other                                    | 11 (2%)                                | 6 (3%)                             |                     |
| Body mass index (kg/m <sup>2</sup> )     | 32 ± 9                                 | 31 ± 9                             | 0.300 <sup>2</sup>  |
| American Society of Anesthesiology class |                                        |                                    | <0.001 <sup>1</sup> |
| II                                       | 24 (4%)                                | 2 (1%)                             |                     |
| III                                      | 356 (60%)                              | 110 (46%)                          |                     |
| IV                                       | 209 (36%)                              | 128 (53%)                          |                     |
| Emergent surgery                         | 25 (4%)                                | 3 (1%)                             | 0.033 <sup>1</sup>  |
| Code status for surgery                  |                                        |                                    | 1.000 <sup>1</sup>  |
| Full code                                | 580 (98%)                              | 236 (98%)                          |                     |
| “Do not resuscitate”                     | 9 (2%)                                 | 4 (2%)                             |                     |
| Past medical history                     |                                        |                                    |                     |
| Hypertension                             | 459 (78%)                              | 188 (77%)                          | 0.927 <sup>1</sup>  |
| Diabetes                                 | 220 (37%)                              | 89 (37%)                           | 1.000 <sup>1</sup>  |
| Chronic obstructive pulmonary disease    | 173 (29%)                              | 73 (30%)                           | 0.802 <sup>1</sup>  |
| Chronic kidney disease                   | 202 (34%)                              | 94 (39%)                           | 0.201 <sup>1</sup>  |
| Coronary artery disease                  | 169 (29%)                              | 76 (32%)                           | 0.402 <sup>1</sup>  |
| Carotid disease                          | 41 (7%)                                | 14 (7%)                            | 0.645 <sup>1</sup>  |
| Pulmonary embolism                       | 44 (8%)                                | 16 (7%)                            | 0.769 <sup>1</sup>  |
| Left heart failure                       | 281 (48%)                              | 130 (54%)                          | 0.093 <sup>1</sup>  |
| Right heart failure                      | 41 (7%)                                | 22 (9%)                            | 0.312 <sup>1</sup>  |
| Preoperative medications                 |                                        |                                    |                     |
| Angiotensin pathway disruptor            | 53 (9%)                                | 17 (7%)                            | 0.411 <sup>1</sup>  |
| Beta blocker                             | 70 (12%)                               | 36 (15%)                           | 0.251 <sup>1</sup>  |
| <b>Cardiac studies</b>                   |                                        |                                    |                     |
| Left ventricular ejection fraction (%)   | 56 ± 9                                 | 55 ± 10                            | 0.011 <sup>2</sup>  |
| Left ventricular diastolic function      |                                        |                                    | 0.756 <sup>1</sup>  |
| Normal                                   | 129 (34%)                              | 49 (35%)                           |                     |
| Grade I dysfunction                      | 113 (30%)                              | 48 (34%)                           |                     |
| Grade II dysfunction                     | 24 (6%)                                | 6 (4%)                             |                     |
| Grade III+ dysfunction                   | 1 (<1%)                                | 0 (0%)                             |                     |
| Right ventricular function               |                                        |                                    | 0.068 <sup>1</sup>  |
| Normal                                   | 457 (76%)                              | 173 (83%)                          |                     |
| Mild dysfunction                         | 73 (16%)                               | 37 (13%)                           |                     |
| Moderate Dysfunction                     | 15 (6%)                                | 14 (3%)                            |                     |
| Severe Dysfunction                       | 7 (1%)                                 | 3 (1%)                             |                     |

|                                                   |           |          |                     |
|---------------------------------------------------|-----------|----------|---------------------|
| Valvular dysfunction (at least moderate severity) |           |          |                     |
| Mitral regurgitation                              | 47 (8%)   | 25 (11%) | 0.281 <sup>1</sup>  |
| Mitral stenosis                                   | 7 (1%)    | 6 (3%)   | 0.218 <sup>1</sup>  |
| Aortic insufficiency                              | 19 (3%)   | 5 (2%)   | 0.495 <sup>1</sup>  |
| Aortic stenosis                                   | 15 (3%)   | 15 (6%)  | 0.014 <sup>1</sup>  |
| Tricuspid regurgitation                           | 88 (16%)  | 45 (19%) | 0.211 <sup>1</sup>  |
| Tricuspid stenosis                                | 0 (0%)    | 0 (0%)   | 1.000 <sup>1</sup>  |
| Pulmonic insufficiency                            | 4 (1%)    | 2 (1%)   | 1.000 <sup>1</sup>  |
| Pulmonic stenosis                                 | 0 (0%)    | 0 (0%)   | 1.000 <sup>1</sup>  |
| Pulmonary artery systolic pressure (mm Hg)        | 51 ± 18   | 50 ± 20  | 0.343 <sup>2</sup>  |
| Right atrial pressure (mm Hg)                     | 8 ± 5     | 8 ± 5    | 0.724 <sup>2</sup>  |
| Classification of PH                              |           |          | 0.251 <sup>1</sup>  |
| Group 1, pulmonary arterial hypertension          | 23 (4%)   | 13 (5%)  |                     |
| Group 2, congestive left heart disease            | 164 (28%) | 83 (35%) |                     |
| Group 3, chronic hypoxic lung disease             | 58 (10%)  | 17 (7%)  |                     |
| Group 4, chronic thromboembolic                   | 10 (2%)   | 2 (1%)   |                     |
| Group 5, unclear/ multifactorial                  | 158 (27%) | 63 (26%) |                     |
| Unknown                                           | 176 (30%) | 62 (26%) |                     |
| <b>Intraoperative details</b>                     |           |          |                     |
| Type of surgery                                   |           |          | <0.001 <sup>1</sup> |
| Thoracic                                          | 2 (<1%)   | 21 (9%)  |                     |
| Vascular                                          | 15 (3%)   | 16 (7%)  |                     |
| Ear-nose-throat/ oromaxillofacial                 | 67 (11%)  | 22 (9%)  |                     |
| Ophthalmology                                     | 6 (1%)    | 0 (0%)   |                     |
| Gastroenterology                                  | 103 (18%) | 29 (12%) |                     |
| General Surgery                                   | 58 (10%)  | 12 (5%)  |                     |
| Surgical Oncology                                 | 26 (4%)   | 7 (3%)   |                     |
| Obstetrics/ gynecology                            | 30 (5%)   | 7 (3%)   |                     |
| Urology                                           | 50 (9%)   | 10 (4%)  |                     |
| Orthopedic                                        | 108 (18%) | 7 (3%)   |                     |
| Neurosurgery                                      | 17 (3%)   | 4 (2%)   |                     |
| Trauma                                            | 34 (6%)   | 13 (5%)  |                     |
| Plastic                                           | 22 (4%)   | 5 (2%)   |                     |
| Transplant                                        | 11 (2%)   | 8 (3%)   |                     |
| Cardiology                                        | 15 (3%)   | 62 (26%) |                     |
| Pulmonology                                       | 25 (4%)   | 17 (7%)  |                     |
| Pre-induction mean arterial pressure (mm Hg)      | 99 ± 19   | 97 ± 18  | 0.086 <sup>2</sup>  |

Variables expressed as mean (± SD) or as total (%).

No data were available for cardiac studies for 47 patients.

<sup>1</sup>Fisher's exact test; <sup>2</sup>Kruskal-Wallis rank sum test

**Supplemental Table 2.** Practice patterns of anesthesiologists without and with fellowship training in cardiothoracic anesthesiology (CTA); results shown for the unmatched population.

|                             | Non-CTA<br>trained<br>(n=589) | CTA<br>trained<br>(n=240) | P value             |
|-----------------------------|-------------------------------|---------------------------|---------------------|
| Pre-induction arterial line | 57 (10%)                      | 57 (24%)                  | <0.001 <sup>1</sup> |
| Type of airway              |                               |                           | 0.002 <sup>1</sup>  |
| Endotracheal tube           | 501 (85%)                     | 223 (93%)                 |                     |

|                                         |           |           |                     |
|-----------------------------------------|-----------|-----------|---------------------|
| Laryngeal mask airway                   | 87 (15%)  | 17 (7%)   |                     |
| Preservation of spontaneous ventilation | 46 (8%)   | 16 (7%)   | 0.663 <sup>1</sup>  |
| Pre-emptive inotrope or vasopressor use | 63 (11%)  | 66 (28%)  | <0.001 <sup>1</sup> |
| Primary induction agent                 |           |           |                     |
| Propofol                                | 559 (95%) | 225 (94%) | 0.790 <sup>1</sup>  |
| Etomidate                               | 15 (3%)   | 7 (3%)    |                     |
| Ketamine                                | 2 (<1%)   | 0 (0%)    |                     |
| Opioid/ benzodiazepine                  | 3 (1%)    | 1 (1%)    |                     |
| Combination                             | 9 (2%)    | 6 (3%)    |                     |
| Volatile agent                          | 1 (<1%)   | 1 (<1%)   |                     |
| Propofol dose (mg)                      | 127 (51)  | 115 (54)  | 0.003 <sup>2</sup>  |

Variables expressed as mean ( $\pm$  SD) or as total (%).

<sup>1</sup>Fisher's exact test; <sup>2</sup>Kruskal-Wallis rank sum test

**Supplemental Table 3.** Comparison of post-induction hemodynamics and other outcomes; results shown for the unmatched population.

|                                                           | <b>Non-CTA<br/>trained<br/>(n=589)</b> | <b>CTA<br/>trained<br/>(n=240)</b> | <b>P value</b>     |
|-----------------------------------------------------------|----------------------------------------|------------------------------------|--------------------|
| Post-induction mean arterial pressure <55 mm Hg           | 163 (28%)                              | 63 (26%)                           | 0.731 <sup>1</sup> |
| Post-induction decrease in mean arterial pressure (mm Hg) | 32 $\pm$ 20                            | 31 $\pm$ 18                        | 0.517 <sup>2</sup> |
| Post-induction % decrease in mean arterial pressure       | 31 $\pm$ 17                            | 31 $\pm$ 16                        | 0.871 <sup>2</sup> |
| Reactive inotrope or vasopressor use                      | 239 (41%)                              | 110 (46%)                          | 0.187 <sup>1</sup> |
| Major post-induction hemodynamic events                   | 2 (<1%)                                | 2 (1%)                             | 0.584 <sup>1</sup> |
| Post-operative hospital length of stay                    | 4 $\pm$ 10                             | 6 $\pm$ 14                         | 0.002 <sup>2</sup> |
| 30-day mortality                                          | 10 (2%)                                | 7 (3%)                             | 0.283 <sup>1</sup> |

Variables expressed as mean ( $\pm$  SD) or as total (%).

<sup>1</sup>Fisher's exact test; <sup>2</sup>Kruskal-Wallis rank sum test
